# Supplementary material
Source: MDPI journal article supplement (https://www.mdpi.com/2304-6740/9/9/67)
Supplement: s1 [file s1]

# 2-Aminopyrimidinium Decavanadate: Experimental and Theoretical Characterization, Molecular Docking, and Potential Antineoplastic Activity

Amalia García-García <sup>1,2</sup>, Lisset Noriega <sup>3</sup>, Francisco J. Meléndez-Bustamante <sup>3</sup>, María Eugenia Castro <sup>1</sup>, Brenda L. Sánchez-Gaytán <sup>1</sup>, Duane Choquesillo-Lazarte <sup>4</sup>, Enrique González-Vergara <sup>1,\*</sup> and Antonio Rodríguez-Diéguez <sup>2,\*</sup>

<sup>1</sup> Centro de Química del Instituto de Ciencias, Benemérita Universidad Autónoma de Puebla, 18 sur y Av. San Claudio, Col. San Manuel, C. P. 72570 Puebla, Mexico; amaliagarcia@correo.ugr.es (A.G.-G.); mareug.castro@correo.buap.mx (M.E.C.); brenda.sanchez@viep.com.mx (B.L.S.-G.)

<sup>2</sup> Departamento de Química Inorgánica, Facultad de Ciencias, Universidad de Granada, Av. Fuentenueva S/N, 18071 Granada, Spain

<sup>3</sup> Facultad de Ciencias Químicas, Benemérita Universidad Autónoma de Puebla, 18 sur y Av. San Claudio, Col. San Manuel, C. P. 72570 Puebla, Mexico; lisset.noriega@alumno.buap.mx (L.N.); francisco.melendez@correo.buap.mx (F.J.M.-B.)

<sup>4</sup> Laboratorio de Estudios Cristalográficos, IACT, CSIC-UGR, Av. Las Palmeras nº4, 18100 Granada, Spain; duane.choquesillo@csic.es

\* Correspondence: enrique.gonzalez@correo.buap.mx (E.G.-V.); antonio5@ugr.es (A.R.-D.);

Tel.: +52-222-363-0623 (E.G.-V.); +34-958-248-524 (A.R.-D.)

## Supplementary Material

### INDEX

#### Crystallographic additional information

**Table S1.** Fractional Atomic Coordinates ( $\times 10^4$ ) and Equivalent Isotropic Displacement Parameters ( $\text{\AA}^2 \times 10^3$ ) for **Compound 1**.  $U_{eq}$  is defined as 1/3 of the trace of the orthogonalised  $U_{ij}$  tensor.

**Table S2.** Anisotropic Displacement Parameters ( $\text{\AA}^2 \times 10^3$ ) for **Compound 1**. The Anisotropic displacement factor exponent takes the form:  $-2\pi^2[h^2a^2U_{11} + 2hka^*b^*U_{12} + \dots]$ .

**Table S3.** Bond Lengths for **Compound 1**.

**Table S4.** Bond Angles for **Compound 1**.

**Table S5.** Torsion Angles for **Compound 1**.

**Table S6.** Hydrogen Atom Coordinates ( $\text{\AA} \times 10^4$ ) and Isotropic Displacement Parameters ( $\text{\AA}^2 \times 10^3$ ) for **Compound 1**.

**Table S7.** Atomic Occupancy for **Compound 1**.

#### Thermogravimetric analysis

**Figure S1.** TG spectrum of **Compound 1** in the range of 35–950°C.

## Crystallographic additional information

**Table S1.** Fractional Atomic Coordinates ( $\times 10^4$ ) and Equivalent Isotropic Displacement Parameters ( $\text{\AA}^2 \times 10^3$ ) for **Compound 1**.  $U_{eq}$  is defined as 1/3 of the trace of the orthogonalised  $U_{ij}$  tensor.

| Atom | <i>x</i>    | <i>y</i>   | <i>z</i>   | <i>U</i> (eq) |
|------|-------------|------------|------------|---------------|
| C1A  | 5297(3)     | -2(3)      | 6515(2)    | 24.7(6)       |
| C2A  | 7590(3)     | 330(3)     | 6297(3)    | 34.4(7)       |
| C3A  | 7392(4)     | -759(3)    | 5332(3)    | 37.5(8)       |
| C4A  | 6077(3)     | -1456(3)   | 4991(3)    | 32.4(7)       |
| N1A  | 4280(3)     | 371(3)     | 7077(2)    | 33.2(6)       |
| N2A  | 6592(3)     | 709(2)     | 6893(2)    | 30.2(6)       |
| N3A  | 5037(3)     | -1061(2)   | 5575(2)    | 26.3(5)       |
| C1B  | 13668(3)    | 6805(3)    | 10280(2)   | 29.1(6)       |
| C2B  | 16004(3)    | 6887(3)    | 10264(3)   | 36.2(7)       |
| C3B  | 15809(4)    | 5965(3)    | 9193(3)    | 35.9(7)       |
| C4B  | 14464(4)    | 5506(3)    | 8677(3)    | 32.4(7)       |
| N1B  | 12627(3)    | 7177(3)    | 10803(3)   | 46.5(8)       |
| N2B  | 14992(3)    | 7312(3)    | 10807(2)   | 32.4(6)       |
| N3B  | 13409(3)    | 5936(2)    | 9219(2)    | 30.3(6)       |
| C1C  | 5475(3)     | 1560(3)    | 1611(2)    | 23.2(6)       |
| C2C  | 3141(3)     | 1372(3)    | 1693(3)    | 33.9(7)       |
| C3C  | 3360(3)     | 2370(3)    | 2714(3)    | 31.1(7)       |
| C4C  | 4716(3)     | 2954(3)    | 3144(3)    | 27.6(6)       |
| N1C  | 6513(3)     | 1155(3)    | 1076(2)    | 36.1(7)       |
| N2C  | 4159(3)     | 956(3)     | 1130(2)    | 30.5(6)       |
| N3C  | 5777(2)     | 2550(2)    | 2605.5(19) | 22.6(5)       |
| O1   | 8477.6(19)  | 5610.9(18) | 7484.3(15) | 22.2(4)       |
| O2   | 6244(2)     | 3651(2)    | 6907.2(18) | 32.0(5)       |
| O3   | 7469.6(19)  | 2519.9(18) | 5129.4(16) | 22.0(4)       |
| O4   | 8566(2)     | 1083.4(19) | 3394.4(18) | 29.6(5)       |
| O5   | 10083(2)    | 2093.7(18) | 5453.5(17) | 24.3(4)       |
| O6   | 11573(3)    | 2834(2)    | 7553(2)    | 39.7(6)       |
| O7   | 12230.6(19) | 3987.7(19) | 6017.7(16) | 22.2(4)       |
| O8   | 7077.4(18)  | 4875.6(18) | 5442.9(15) | 20.3(4)       |
| O9   | 11092(2)    | 5191.2(19) | 7773.4(15) | 23.9(4)       |
| O10  | 8275.1(18)  | 3598.6(17) | 3654.2(14) | 17.6(4)       |
| O11  | 10593(2)    | 7588(2)    | 8265.4(16) | 30.4(5)       |
| O12  | 8926(2)     | 3283(2)    | 7194.9(16) | 26.0(4)       |
| O13  | 9311.7(18)  | 6808.4(17) | 6067.0(15) | 17.7(4)       |
| O14  | 9655.0(18)  | 4442.2(17) | 5716.0(14) | 16.7(4)       |
| V1   | 9055.4(5)   | 2430.0(4)  | 4428.6(4)  | 18.89(11)     |
| V2   | 7681.5(5)   | 3917.4(5)  | 6468.4(4)  | 21.63(11)     |
| V3   | 10689.7(5)  | 3476.0(5)  | 6853.7(4)  | 24.46(12)     |
| V4   | 8412.2(4)   | 5313.1(4)  | 4843.2(3)  | 16.14(10)     |
| V5   | 10113.1(5)  | 6232.1(4)  | 7245.6(4)  | 19.20(11)     |

| Atom | <i>x</i>  | <i>y</i> | <i>z</i>  | U(eq)  |
|------|-----------|----------|-----------|--------|
| O1W  | 9553(5)   | 6138(7)  | 9966(4)   | 180(3) |
| O2W  | 9810(20)  | 177(19)  | 10187(16) | 180(6) |
| O3W  | 10485(10) | 958(9)   | 8635(8)   | 257(4) |

**Table S2.** Anisotropic Displacement Parameters ( $\text{\AA}^2 \times 10^3$ ) for **Compound 1**. The Anisotropic displacement factor exponent takes the form:  $-2\pi^2[h^2a^{*2}U_{11}+2hka^*b^*U_{12}+\dots]$ .

| Atom | U <sub>11</sub> | U <sub>22</sub> | U <sub>33</sub> | U <sub>23</sub> | U <sub>13</sub> | U <sub>12</sub> |
|------|-----------------|-----------------|-----------------|-----------------|-----------------|-----------------|
| C1A  | 23.4(14)        | 23.4(14)        | 25.5(14)        | 10.4(11)        | -1.6(11)        | -1.9(11)        |
| C2A  | 20.2(15)        | 30.9(16)        | 46.8(19)        | 11.0(14)        | 3.5(13)         | -3.5(12)        |
| C3A  | 29.2(17)        | 36.0(18)        | 44.9(19)        | 9.4(15)         | 12.9(14)        | 7.8(14)         |
| C4A  | 34.9(17)        | 23.4(15)        | 34.0(16)        | 4.5(13)         | 4.0(13)         | 5.8(13)         |
| N1A  | 23.2(13)        | 36.5(15)        | 30.1(13)        | 2.9(11)         | 4.0(10)         | -2.8(11)        |
| N2A  | 22.5(13)        | 27.3(13)        | 33.2(14)        | 4.9(11)         | 1.5(10)         | -2.6(10)        |
| N3A  | 22.4(12)        | 21.8(12)        | 30.3(13)        | 7.4(10)         | -1.5(10)        | -1.9(9)         |
| C1B  | 26.3(15)        | 31.8(16)        | 25.1(14)        | 7.9(12)         | -0.3(12)        | 0.3(12)         |
| C2B  | 22.6(15)        | 47(2)           | 34.9(17)        | 12.7(15)        | -1.7(13)        | 3.1(14)         |
| C3B  | 32.1(17)        | 43.4(19)        | 32.2(17)        | 11.3(15)        | 6.0(13)         | 12.4(14)        |
| C4B  | 39.8(18)        | 30.9(16)        | 23.0(14)        | 6.3(12)         | 0.9(13)         | 7.0(14)         |
| N1B  | 25.9(15)        | 61(2)           | 36.2(16)        | 0.3(14)         | 2.7(12)         | 1.9(14)         |
| N2B  | 24.5(13)        | 39.2(15)        | 24.1(12)        | 4.0(11)         | -4.2(10)        | -0.1(11)        |
| N3B  | 25.8(13)        | 31.7(14)        | 25.5(12)        | 5.4(11)         | -6.9(10)        | -0.1(11)        |
| C1C  | 19.4(13)        | 23.8(14)        | 21.5(13)        | 4.0(11)         | -0.2(10)        | 1.5(11)         |
| C2C  | 18.0(14)        | 41.8(18)        | 37.1(17)        | 9.3(14)         | 0.9(12)         | 5.6(13)         |
| C3C  | 22.0(15)        | 37.5(17)        | 34.0(16)        | 9.8(14)         | 8.1(12)         | 12.1(13)        |
| C4C  | 27.9(15)        | 26.4(15)        | 25.9(14)        | 5.7(12)         | 1.8(12)         | 7.7(12)         |
| N1C  | 17.2(12)        | 41.9(16)        | 30.6(14)        | -7.4(12)        | 2.1(10)         | -1.3(11)        |
| N2C  | 17.3(12)        | 36.6(14)        | 26.3(12)        | 0.7(11)         | -2.3(10)        | -0.2(10)        |
| N3C  | 17.5(11)        | 22.5(11)        | 21.7(11)        | 2.8(9)          | -2.2(9)         | 1.0(9)          |
| O1   | 17.2(9)         | 25.1(10)        | 18.2(9)         | 1.3(8)          | 4.3(7)          | 0.3(8)          |
| O2   | 23.1(11)        | 36.2(12)        | 31.7(11)        | 6.7(9)          | 11.1(9)         | -1.9(9)         |
| O3   | 16.4(9)         | 20.4(9)         | 23.3(9)         | 2.0(8)          | 4.2(7)          | -2.1(7)         |
| O4   | 27.1(11)        | 20.6(10)        | 30.1(11)        | -2.5(8)         | 5.4(9)          | -2.0(8)         |
| O5   | 20.8(10)        | 22.1(10)        | 29.2(10)        | 7.8(8)          | 3.7(8)          | 5.3(8)          |
| O6   | 37.8(13)        | 48.8(15)        | 38.6(13)        | 23.6(11)        | -1.0(10)        | 12.3(11)        |
| O7   | 14.8(9)         | 26.6(10)        | 23.3(9)         | 7.1(8)          | -0.5(7)         | 4.9(8)          |
| O8   | 12.8(9)         | 21.8(9)         | 20.1(9)         | 0.5(7)          | 3.0(7)          | 0.4(7)          |
| O9   | 16.3(9)         | 32.7(11)        | 18.0(9)         | 5.6(8)          | -1.7(7)         | 1.2(8)          |
| O10  | 12.5(8)         | 19.0(9)         | 14.9(8)         | -0.3(7)         | 0.7(7)          | -0.2(7)         |
| O11  | 25.7(11)        | 32.1(11)        | 19.3(9)         | -4.7(8)         | 3.1(8)          | -3.9(9)         |
| O12  | 24.3(10)        | 29.4(11)        | 22.5(10)        | 9.0(8)          | 4.0(8)          | -0.1(8)         |
| O13  | 12.1(8)         | 18.7(9)         | 17.2(8)         | 0.2(7)          | 2.0(7)          | 2.4(7)          |
| O14  | 13.1(8)         | 18.4(9)         | 15.1(8)         | 1.8(7)          | 2.1(7)          | 1.9(7)          |
| V1   | 14.9(2)         | 16.5(2)         | 20.1(2)         | 1.27(17)        | 2.51(17)        | 0.07(16)        |
| V2   | 16.9(2)         | 23.5(2)         | 20.0(2)         | 3.17(18)        | 5.31(17)        | -0.75(18)       |

| Atom | U <sub>11</sub> | U <sub>22</sub> | U <sub>33</sub> | U <sub>23</sub> | U <sub>13</sub> | U <sub>12</sub> |
|------|-----------------|-----------------|-----------------|-----------------|-----------------|-----------------|
| V3   | 20.8(2)         | 29.8(3)         | 22.1(2)         | 9.9(2)          | 0.31(18)        | 3.06(19)        |
| V4   | 9.27(19)        | 18.8(2)         | 15.7(2)         | 1.16(16)        | 0.67(15)        | 1.43(16)        |
| V5   | 14.4(2)         | 22.6(2)         | 13.3(2)         | -0.92(17)       | 1.38(16)        | -0.47(17)       |
| O1W  | 73(3)           | 401(10)         | 60(3)           | 99(4)           | 7(2)            | -20(4)          |
| O2W  | 125(11)         | 143(13)         | 150(13)         | -99(9)          | -23(9)          | 58(8)           |
| O3W  | 240(10)         | 277(11)         | 276(11)         | 139(10)         | 64(8)           | -1(8)           |

Table S3. Bond Lengths for Compound 1.<sup>a</sup>

| Atoms   | Length/Å   | Atoms              | Length/Å   |
|---------|------------|--------------------|------------|
| C1A-N1A | 1.316(4)   | O6-V3              | 1.595(2)   |
| C1A-N2A | 1.353(4)   | O7-V3              | 2.069(2)   |
| C1A-N3A | 1.350(4)   | O7-V4 <sup>a</sup> | 1.686(2)   |
| C2A-C3A | 1.390(5)   | O8-V2              | 2.064(2)   |
| C2A-N2A | 1.324(4)   | O8-V4              | 1.6838(19) |
| C3A-C4A | 1.361(5)   | O9-V3              | 1.855(2)   |
| C4A-N3A | 1.356(4)   | O9-V5              | 1.866(2)   |
| C1B-N1B | 1.311(4)   | O10-V1             | 2.084(2)   |
| C1B-N2B | 1.353(4)   | O10-V4             | 1.9903(19) |
| C1B-N3B | 1.353(4)   | O10-V5(i)          | 2.0719(19) |
| C2B-C3B | 1.387(5)   | O11-V5             | 1.611(2)   |
| C2B-N2B | 1.315(4)   | O12-V2             | 1.827(2)   |
| C3B-C4B | 1.361(5)   | O12-V3             | 1.826(2)   |
| C4B-N3B | 1.351(4)   | O13-V1(i)          | 1.979(2)   |
| C1C-N1C | 1.325(4)   | O13-V4             | 1.9002(18) |
| C1C-N2C | 1.351(4)   | O13-V5             | 1.979(2)   |
| C1C-N3C | 1.352(3)   | O14-V1             | 2.2633(19) |
| C2C-C3C | 1.380(4)   | O14-V2             | 2.3403(19) |
| C2C-N2C | 1.329(4)   | O14-V3             | 2.336(2)   |
| C3C-C4C | 1.369(4)   | O14-V4(i)          | 2.106(2)   |
| C4C-N3C | 1.347(4)   | O14-V4             | 2.1248(19) |
| O1-V2   | 1.914(2)   | O14-V5             | 2.2378(18) |
| O1-V5   | 1.760(2)   | V1-V3              | 3.1067(12) |
| O2-V2   | 1.596(2)   | V2-V3              | 3.0701(16) |
| O3-V1   | 1.866(2)   | V2-V4              | 3.1042(11) |
| O3-V2   | 1.8631(19) | V2-V5              | 3.0988(12) |
| O4-V1   | 1.613(2)   | V3-V4(i)           | 3.0862(11) |
| O5-V1   | 1.754(2)   | V3-V5              | 3.1182(15) |
| O5-V3   | 1.908(2)   | V4-V5              | 3.1154(12) |

<sup>a</sup> Symmetry operation: (i) = 2-x, 1-y, 1-z.Table S4. Bond Angles for Compound 1.<sup>a</sup>

| Atoms       | Angle/°  | Atoms       | Angle/°  |
|-------------|----------|-------------|----------|
| N1A-C1A-N2A | 118.5(3) | O5-V3-V4(i) | 77.72(7) |

| Atoms                   | Angle/°    | Atoms           | Angle/°    |
|-------------------------|------------|-----------------|------------|
| N1A-C1A-N3A             | 120.2(3)   | O5-V3-V5        | 122.33(7)  |
| N3A-C1A-N2A             | 121.3(3)   | O6-V3-O5        | 102.04(12) |
| N2A-C2A-C3A             | 124.1(3)   | O6-V3-O7        | 98.64(11)  |
| C4A-C3A-C2A             | 116.6(3)   | O6-V3-O9        | 102.27(12) |
| N3A-C4A-C3A             | 120.0(3)   | O6-V3-O12       | 105.64(12) |
| C2A-N2A-C1A             | 117.3(3)   | O6-V3-O14       | 172.46(10) |
| C1A-N3A-C4A             | 120.7(3)   | O6-V3-V1        | 132.53(10) |
| N1B-C1B-N2B             | 119.2(3)   | O6-V3-V2        | 138.45(10) |
| N1B-C1B-N3B             | 119.9(3)   | O6-V3-V4(i)     | 129.49(10) |
| N2B-C1B-N3B             | 120.9(3)   | O6-V3-V5        | 135.36(10) |
| N2B-C2B-C3B             | 124.7(3)   | O7-V3-O14       | 73.85(8)   |
| C4B-C3B-C2B             | 116.3(3)   | O7-V3-V1        | 80.26(6)   |
| N3B-C4B-C3B             | 119.9(3)   | O7-V3-V2        | 122.84(6)  |
| C2B-N2B-C1B             | 117.2(3)   | O7-V3-V4(i)     | 30.85(5)   |
| C4B-N3B-C1B             | 120.9(3)   | O7-V3-V5        | 83.26(6)   |
| N1C-C1C-N2C             | 118.0(3)   | O9-V3-O5        | 154.01(9)  |
| N1C-C1C-N3C             | 118.8(3)   | O9-V3-O7        | 84.30(9)   |
| N2C-C1C-N3C             | 123.1(3)   | O9-V3-O14       | 78.01(8)   |
| N2C-C2C-C3C             | 123.8(3)   | O9-V3-V1        | 124.53(7)  |
| C4C-C3C-C2C             | 116.5(3)   | O9-V3-V2        | 85.60(6)   |
| N3C-C4C-C3C             | 121.4(3)   | O9-V3-V4(i)     | 79.82(7)   |
| C2C-N2C-C1C             | 116.7(3)   | O9-V3-V5        | 33.20(6)   |
| C4C-N3C-C1C             | 118.5(2)   | O12-V3-O5       | 89.57(9)   |
| V5-O1-V2                | 114.95(10) | O12-V3-O7       | 155.61(9)  |
| V2-O3-V1                | 113.78(10) | O12-V3-O9       | 92.62(9)   |
| V1-O5-V3                | 116.00(11) | O12-V3-O14      | 81.84(8)   |
| V4(i)-O7-V3             | 110.14(10) | O12-V3-V1       | 81.69(7)   |
| V4-O8-V2                | 111.43(10) | O12-V3-V2       | 32.82(7)   |
| V3-O9-V5                | 113.83(10) | O12-V3-V4(i)    | 124.80(7)  |
| V4-O10-V1               | 106.92(9)  | O12-V3-V5       | 81.11(7)   |
| V4-O10-V5(i)            | 106.04(8)  | O14-V3-V1       | 46.53(5)   |
| V5 <sup>a</sup> -O10-V1 | 98.07(8)   | O14-V3-V2       | 49.02(4)   |
| V3-O12-V2               | 114.39(11) | O14-V3-V4(i)    | 43.00(5)   |
| V4-O13-V1(i)            | 107.29(9)  | O14-V3-V5       | 45.71(5)   |
| V4-O13-V5               | 106.85(9)  | V1-V3-V5        | 91.93(2)   |
| V5-O13-V1(i)            | 104.91(9)  | V2-V3-V1        | 60.75(2)   |
| V1-O14-V2               | 85.44(6)   | V2-V3-V4(i)     | 91.99(3)   |
| V1-O14-V3               | 84.96(7)   | V2-V3-V5        | 60.093(16) |
| V3-O14-V2               | 82.07(7)   | V4(i)-V3-V1     | 60.60(3)   |
| V4-O14-V1               | 96.45(7)   | V4(i)-V3-V5     | 63.08(2)   |
| V4(i)-O14-V1            | 91.23(7)   | O7(i)-V4-O10    | 95.75(9)   |
| V4(i)-O14-V2            | 169.61(10) | O7(i)-V4-O13    | 98.96(10)  |
| V4-O14-V2               | 87.95(7)   | O7(i)-V4-O14(i) | 88.16(9)   |
| V4(i)-O14-V3            | 87.85(7)   | O7(i)-V4-O14    | 165.77(8)  |

| Atoms         | Angle/°    | Atoms                  | Angle/°    |
|---------------|------------|------------------------|------------|
| V4-O14-V3     | 169.78(9)  | O7(i)-V4-V2            | 144.98(7)  |
| V4(i)-O14-V4  | 102.21(8)  | O7(i)-V4-V3(i)         | 39.00(7)   |
| V4(i)-O14-V5  | 96.64(7)   | O7(i)-V4-V5            | 136.37(7)  |
| V4-O14-V5     | 91.10(7)   | O8-V4-O7(i)            | 106.82(10) |
| V5-O14-V1     | 167.72(9)  | O8-V4-O10              | 95.42(8)   |
| V5-O14-V2     | 85.17(6)   | O8-V4-O13              | 98.48(9)   |
| V5-O14-V3     | 85.92(7)   | O8-V4-O14(i)           | 164.76(9)  |
| O3-V1-O10     | 86.43(8)   | O8-V4-O14              | 87.13(9)   |
| O3-V1-O13(i)  | 153.14(8)  | O8-V4-V2               | 38.24(7)   |
| O3-V1-O14     | 80.41(7)   | O8-V4-V3(i)            | 145.77(7)  |
| O3-V1-V3      | 84.81(7)   | O8-V4-V5               | 84.53(7)   |
| O4-V1-O3      | 100.61(10) | O10-V4-O14             | 79.74(8)   |
| O4-V1-O5      | 105.69(11) | O10-V4-O14(i)          | 79.90(7)   |
| O4-V1-O10     | 97.82(10)  | O10-V4-V2              | 87.79(7)   |
| O4-V1-O13(i)  | 101.14(9)  | O10-V4-V3(i)           | 88.37(6)   |
| O4-V1-O14     | 172.38(10) | O10-V4-V5              | 125.64(6)  |
| O4-V1-V3      | 138.98(9)  | O13-V4-O10             | 155.87(8)  |
| O5-V1-O3      | 95.59(10)  | O13-V4-O14(i)          | 81.56(7)   |
| O5-V1-O10     | 155.56(8)  | O13-V4-O14             | 81.35(8)   |
| O5-V1-O13(i)  | 93.52(9)   | O13-V4-V2              | 91.00(7)   |
| O5-V1-O14     | 81.65(8)   | O13-V4-V3(i)           | 91.11(7)   |
| O5-V1-V3      | 33.51(7)   | O13-V4-V5              | 37.44(6)   |
| O10-V1-O14    | 74.66(7)   | O14(i)-V4-O14          | 77.79(8)   |
| O10-V1-V3     | 123.17(5)  | O14(i)-V4-V2           | 126.64(5)  |
| O13(i)-V1-O10 | 75.16(8)   | O14-V4-V2              | 48.89(5)   |
| O13(i)-V1-O14 | 75.99(7)   | O14(i)-V4-V3(i)        | 49.15(5)   |
| O13(i)-V1-V3  | 89.04(6)   | O14-V4-V3(i)           | 126.92(6)  |
| O14-V1-V3     | 48.51(5)   | O14-V4-V5              | 45.90(5)   |
| O1-V2-O8      | 82.86(9)   | O14(i)-V4-V5           | 86.49(6)   |
| O1-V2-O14     | 76.73(7)   | V2-V4-V5               | 59.77(3)   |
| O1-V2-V3      | 82.42(6)   | V3(i)-V4-V2            | 174.85(2)  |
| O1-V2-V4      | 77.88(7)   | V3(i)-V4-V5            | 120.33(3)  |
| O1-V2-V5      | 31.00(6)   | O1-V5-O9               | 95.07(10)  |
| O2-V2-O1      | 102.30(10) | O1-V5-O10 <sup>a</sup> | 156.99(8)  |
| O2-V2-O3      | 101.66(10) | O1-V5-O13              | 94.18(9)   |
| O2-V2-O8      | 99.78(10)  | O1-V5-O14              | 82.54(8)   |
| O2-V2-O12     | 105.00(11) | O1-V5-V2               | 34.06(6)   |
| O2-V2-O14     | 173.26(10) | O1-V5-V3               | 83.30(7)   |
| O2-V2-V3      | 137.79(9)  | O1-V5-V4               | 79.50(7)   |
| O2-V2-V4      | 130.11(9)  | O9-V5-O10(i)           | 86.88(9)   |
| O2-V2-V5      | 133.30(8)  | O9-V5-O13              | 154.08(8)  |
| O3-V2-O1      | 154.39(8)  | O9-V5-O14              | 80.41(8)   |
| O3-V2-O8      | 84.28(9)   | O9-V5-V2               | 84.58(7)   |
| O3-V2-O14     | 78.42(7)   | O9-V5-V3               | 32.97(6)   |

| Atoms      | Angle/°   | Atoms         | Angle/°    |
|------------|-----------|---------------|------------|
| O3-V2-V3   | 85.93(6)  | O9-V5-V4      | 123.39(6)  |
| O3-V2-V4   | 79.84(7)  | O10(i)-V5-O14 | 75.17(7)   |
| O3-V2-V5   | 124.42(6) | O10(i)-V5-V2  | 123.98(5)  |
| O8-V2-O14  | 73.49(7)  | O10(i)-V5-V3  | 86.10(6)   |
| O8-V2-V3   | 122.36(5) | O10(i)-V5-V4  | 80.33(6)   |
| O8-V2-V4   | 30.33(5)  | O11-V5-O1     | 104.59(10) |
| O8-V2-V5   | 79.54(6)  | O11-V5-O9     | 100.90(11) |
| O12-V2-O1  | 89.37(9)  | O11-V5-O10(i) | 97.51(9)   |
| O12-V2-O3  | 93.09(9)  | O11-V5-O13    | 100.10(11) |
| O12-V2-O8  | 155.08(8) | O11-V5-O14    | 172.53(9)  |
| O12-V2-O14 | 81.70(8)  | O11-V5-V2     | 138.48(8)  |
| O12-V2-V3  | 32.79(6)  | O11-V5-V3     | 133.73(9)  |
| O12-V2-V4  | 124.82(7) | O11-V5-V4     | 135.26(9)  |
| O12-V2-V5  | 81.65(7)  | O13-V5-O10(i) | 75.44(8)   |
| O14-V2-V3  | 48.91(5)  | O13-V5-O14    | 76.86(8)   |
| O14-V2-V4  | 43.16(5)  | O13-V5-V2     | 89.70(6)   |
| O14-V2-V5  | 46.02(5)  | O13-V5-V3     | 125.12(6)  |
| V3-V2-V4   | 92.05(2)  | O13-V5-V4     | 35.72(5)   |
| V3-V2-V5   | 60.72(3)  | O14-V5-V2     | 48.81(5)   |
| V5-V2-V4   | 60.30(3)  | O14-V5-V3     | 48.36(5)   |
| O5-V3-O7   | 83.12(8)  | O14-V5-V4     | 42.99(5)   |
| O5-V3-O14  | 76.68(8)  | V2-V5-V3      | 59.19(3)   |
| O5-V3-V1   | 30.49(6)  | V2-V5-V4      | 59.937(19) |
| O5-V3-V2   | 82.30(6)  | V4-V5-V3      | 90.93(2)   |

<sup>a</sup> Symmetry operation: (i) = 2-x, 1-y, 1-z.

**Table S5.** Torsion Angles for **Compound 1**.<sup>a</sup>

| A   | B   | C   | D   | Angle/°   | A  | B   | C  | D      | Angle/°     |
|-----|-----|-----|-----|-----------|----|-----|----|--------|-------------|
| C2A | C3A | C4A | N3A | 1.3(5)    | V2 | O3  | V1 | V3     | 36.22(10)   |
| C3A | C2A | N2A | C1A | -1.5(5)   | V2 | O8  | V4 | O7(i)  | 177.14(9)   |
| C3A | C4A | N3A | C1A | -2.2(5)   | V2 | O8  | V4 | O10    | 79.45(10)   |
| N1A | C1A | N2A | C2A | -178.4(3) | V2 | O8  | V4 | O13    | -80.76(10)  |
| N1A | C1A | N3A | C4A | -179.8(3) | V2 | O8  | V4 | O14    | 0.04(9)     |
| N2A | C1A | N3A | C4A | 1.3(4)    | V2 | O8  | V4 | O14(i) | 8.2(4)      |
| N2A | C2A | C3A | C4A | 0.5(6)    | V2 | O8  | V4 | V3(i)  | 174.53(4)   |
| N3A | C1A | N2A | C2A | 0.6(4)    | V2 | O8  | V4 | V5     | -45.92(8)   |
| C2B | C3B | C4B | N3B | -1.3(5)   | V2 | O12 | V3 | O5     | -76.37(12)  |
| C3B | C2B | N2B | C1B | 0.3(5)    | V2 | O12 | V3 | O6     | -178.76(13) |
| C3B | C4B | N3B | C1B | -1.1(5)   | V2 | O12 | V3 | O7     | -4.2(3)     |
| N1B | C1B | N2B | C2B | 178.2(3)  | V2 | O12 | V3 | O9     | 77.72(12)   |
| N1B | C1B | N3B | C4B | -177.8(3) | V2 | O12 | V3 | O14    | 0.24(10)    |
| N2B | C1B | N3B | C4B | 3.3(5)    | V2 | O12 | V3 | V1     | -46.80(10)  |
| N2B | C2B | C3B | C4B | 1.7(6)    | V2 | O12 | V3 | V4(i)  | -1.69(14)   |
| N3B | C1B | N2B | C2B | -2.8(5)   | V2 | O12 | V3 | V5     | 46.49(9)    |

| A   | B   | C   | D      | Angle/°     | A  | B   | C  | D      | Angle/°     |
|-----|-----|-----|--------|-------------|----|-----|----|--------|-------------|
| C2C | C3C | C4C | N3C    | -1.5(5)     | V3 | O5  | V1 | O3     | -71.79(12)  |
| C3C | C2C | N2C | C1C    | 0.3(5)      | V3 | O5  | V1 | O4     | -174.48(11) |
| C3C | C4C | N3C | C1C    | 1.1(4)      | V3 | O5  | V1 | O10    | 21.9(3)     |
| N1C | C1C | N2C | C2C    | 179.2(3)    | V3 | O5  | V1 | O13(i) | 82.91(11)   |
| N1C | C1C | N3C | C4C    | -179.9(3)   | V3 | O5  | V1 | O14    | 7.63(10)    |
| N2C | C1C | N3C | C4C    | 0.0(4)      | V3 | O9  | V5 | O1     | 69.38(11)   |
| N2C | C2C | C3C | C4C    | 0.8(5)      | V3 | O9  | V5 | O10(i) | -87.63(11)  |
| N3C | C1C | N2C | C2C    | -0.8(5)     | V3 | O9  | V5 | O11    | 175.32(11)  |
| V1  | O3  | V2  | O1     | 26.3(3)     | V3 | O9  | V5 | O13    | -41.1(2)    |
| V1  | O3  | V2  | O2     | -174.69(12) | V3 | O9  | V5 | O14    | -12.15(10)  |
| V1  | O3  | V2  | O8     | 86.47(11)   | V3 | O9  | V5 | V2     | 36.94(9)    |
| V1  | O3  | V2  | O12    | -68.67(12)  | V3 | O9  | V5 | V4     | -11.37(13)  |
| V1  | O3  | V2  | O14    | 12.20(10)   | V3 | O12 | V2 | O1     | -76.92(12)  |
| V1  | O3  | V2  | V3     | -36.65(10)  | V3 | O12 | V2 | O2     | -179.49(11) |
| V1  | O3  | V2  | V4     | 56.17(9)    | V3 | O12 | V2 | O3     | 77.57(12)   |
| V1  | O3  | V2  | V5     | 13.32(14)   | V3 | O12 | V2 | O8     | -5.5(3)     |
| V2  | O1  | V5  | O9     | -72.51(12)  | V3 | O12 | V2 | O14    | -0.24(10)   |
| V2  | O1  | V5  | O10(i) | 21.5(3)     | V3 | O12 | V2 | V4     | -2.19(14)   |
| V2  | O1  | V5  | O11    | -175.17(12) | V3 | O12 | V2 | V5     | -46.78(9)   |
| V2  | O1  | V5  | O13    | 83.24(12)   | V5 | O9  | V3 | O5     | 25.0(3)     |
| V2  | O1  | V5  | O14    | 7.10(10)    | V5 | O9  | V3 | O6     | -175.98(12) |
| V2  | O1  | V5  | V3     | -41.65(10)  | V5 | O9  | V3 | O7     | 86.39(11)   |
| V2  | O1  | V5  | V4     | 50.55(9)    | V5 | O9  | V3 | O12    | -69.36(12)  |
| V2  | O3  | V1  | O4     | 175.14(12)  | V5 | O9  | V3 | O14    | 11.73(9)    |
| V2  | O3  | V1  | O5     | 67.99(12)   | V5 | O9  | V3 | V1     | 12.35(14)   |
| V2  | O3  | V1  | O10    | -87.57(11)  | V5 | O9  | V3 | V2     | -37.27(9)   |
| V2  | O3  | V1  | O13(i) | -41.3(2)    | V5 | O9  | V3 | V4(i)  | 55.55(9)    |
| V2  | O3  | V1  | O14    | -12.54(10)  |    |     |    |        |             |

<sup>a</sup> Symmetry operation: (i) = 2-x, 1-y, 1-z.

**Table S6.** Hydrogen Atom Coordinates (Å×10<sup>4</sup>) and Isotropic Displacement Parameters (Å<sup>2</sup>×10<sup>3</sup>) for **Compound 1**.

| Atom | x        | y        | z        | U(eq) |
|------|----------|----------|----------|-------|
| H2A  | 8478.95  | 824.51   | 6540.71  | 41    |
| H3A  | 8120.66  | -999.06  | 4937.93  | 45    |
| H4A  | 5893.17  | -2203.74 | 4359.09  | 39    |
| H1AA | 4409.49  | 1037.89  | 7638.62  | 40    |
| H1AB | 3494.19  | 6.49     | 6893.82  | 40    |
| H3AA | 4209.92  | -1484.59 | 5343.4   | 32    |
| H2B  | 16916.53 | 7230.11  | 10623.18 | 43    |
| H3B  | 16555.89 | 5675.16  | 8847.5   | 43    |
| H4B  | 14270.93 | 4898.56  | 7953.1   | 39    |
| H1BA | 12784.5  | 7718.57  | 11550.57 | 56    |
| H1BB | 11946.2  | 6917.07  | 10524.57 | 56    |
| H3BA | 12650.98 | 5730.9   | 8900.87  | 36    |



| Atom | <i>x</i> | <i>y</i> | <i>z</i> | U(eq) |
|------|----------|----------|----------|-------|
| H2C  | 2227.96  | 967.03   | 1379.4   | 41    |
| H3C  | 2625.44  | 2632.78  | 3091.38  | 37    |
| H4C  | 4908.73  | 3644.46  | 3822.87  | 33    |
| H1CA | 6329.07  | 577.81   | 468.38   | 43    |
| H1CB | 7329.57  | 1451.31  | 1319.88  | 43    |
| H3CA | 6825.79  | 3037.48  | 3039.98  | 27    |
| H1WA | 9746.49  | 6890.5   | 10457.75 | 270   |
| H1WB | 9378.19  | 6247.7   | 9348.35  | 270   |
| H2WA | 9847.38  | -94.13   | 9487.59  | 270   |
| H2WB | 9956.58  | 987.37   | 10383.59 | 270   |
| H3WA | 10546.19 | 1637.16  | 8485.98  | 385   |
| H3WB | 10722.19 | 368.06   | 8103.98  | 385   |

Table S7. Atomic Occupancy for Compound 1.

| Atom | Occupancy | Atom | Occupancy | Atom | Occupancy |
|------|-----------|------|-----------|------|-----------|
| O2W  | 0.5       | H2WA | 0.5       | H2WB | 0.5       |

### Thermogravimetric analysis

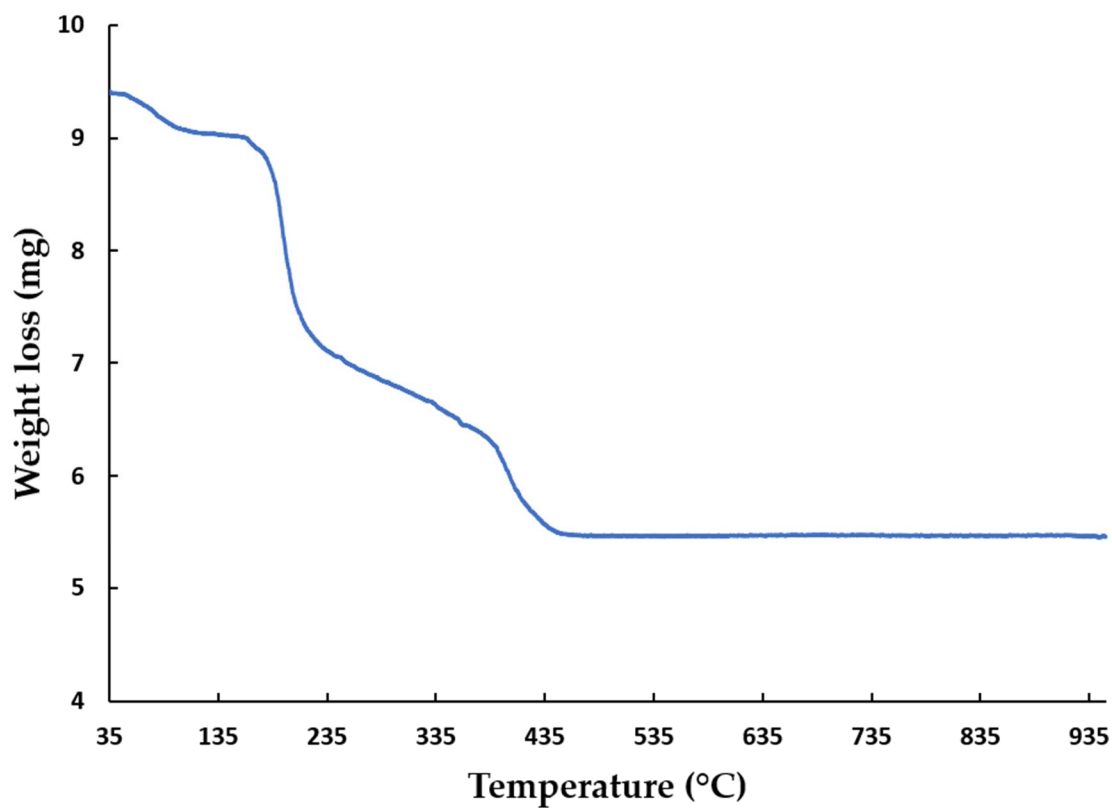

Figure S1. TG spectrum of Compound 1 in the range of 35–950°C.
